# Supplementary material for: Risk Factors of Undiagnosed Diabetes Mellitus among Korean Adults: A National Cross-Sectional Study Using the KNHANES Data
Source: Int J Environ Res Public Health. 2021 Jan 29;18(3):1195. doi: 10.3390/ijerph18031195 (PMC7908078; doi:10.3390/ijerph18031195)
Supplement: Supplementary file 1 [file ijerph-18-01195-s001.pdf]

**Supplement table 1.** Age subgroup analysis results for the impact of baseline risk factors on people with DM and UDM using age- and sex-adjusted multinomial logistic regression model with the without DM group as reference

| Variables                          | Age <40                 |                         | Age ≥40                 |                         |
|------------------------------------|-------------------------|-------------------------|-------------------------|-------------------------|
|                                    | Known                   | Unknown                 | Known                   | Unknown                 |
|                                    | OR [95% CI]             | OR [95% CI]             | OR [95% CI]             | OR [95% CI]             |
| <i>Demographic characteristics</i> |                         |                         |                         |                         |
| <b>Educational attainment</b>      |                         |                         |                         |                         |
| High school or less                | <i>Reference</i>        | <i>Reference</i>        | <i>Reference</i>        | <i>Reference</i>        |
| Higher than high school            | <b>0.30 [0.18-0.49]</b> | <b>0.63 [0.41-0.97]</b> | <b>0.69 [0.61-0.79]</b> | <b>0.70 [0.57-0.85]</b> |
| <b>Marital status</b>              |                         |                         |                         |                         |
| Not married                        | <i>Reference</i>        | <i>Reference</i>        | <i>Reference</i>        | <i>Reference</i>        |
| Married                            | 1.05 [0.50-2.20]        | 0.82 [0.49-1.36]        | <b>0.59 [0.44-0.81]</b> | <b>0.58 [0.38-0.90]</b> |
| <b>Employment status</b>           |                         |                         |                         |                         |
| No                                 | <i>Reference</i>        | <i>Reference</i>        | <i>Reference</i>        | <i>Reference</i>        |
| Yes                                | 0.91 [0.52-1.61]        | 1.05 [0.65-1.69]        | <b>0.76 [0.68-0.84]</b> | <b>0.84 [0.70-1.00]</b> |
| <b>Income level</b>                |                         |                         |                         |                         |
| Low                                | <i>Reference</i>        | <i>Reference</i>        | <i>Reference</i>        | <i>Reference</i>        |
| Middle-low                         | 0.66 [0.36-1.22]        | 0.75 [0.43-1.30]        | <b>0.85 [0.75-0.96]</b> | <b>0.73 [0.59-0.89]</b> |
| Middle                             | 0.80 [0.42-1.50]        | 0.61 [0.33-1.16]        | <b>0.72 [0.63-0.82]</b> | <b>0.62 [0.51-0.76]</b> |
| High                               | 0.55 [0.26-1.18]        | 1.22 [0.73-2.04]        | <b>0.75 [0.66-0.86]</b> | <b>0.60 [0.48-0.74]</b> |
| <i>Health status</i>               |                         |                         |                         |                         |
| <b>Family history of diabetes</b>  |                         |                         |                         |                         |
| No                                 | <i>Reference</i>        | <i>Reference</i>        | <i>Reference</i>        | <i>Reference</i>        |
| Yes                                | <b>4.80 [3.00-7.67]</b> | <b>3.19 [2.11-4.83]</b> | <b>3.66 [3.23-4.14]</b> | <b>1.92 [1.57-2.33]</b> |
| <b>Hypertension status</b>         |                         |                         |                         |                         |
| Normal                             | <i>Reference</i>        | <i>Reference</i>        | <i>Reference</i>        | <i>Reference</i>        |

|                                       |                           |                          |                         |                         |
|---------------------------------------|---------------------------|--------------------------|-------------------------|-------------------------|
| At high risk                          | 1.53 [0.79-2.96]          | <b>2.46 [1.44-4.20]</b>  | <b>1.43 [1.23-1.66]</b> | <b>2.40 [1.93-2.99]</b> |
| Hypertension                          | <b>4.00 [2.06-7.75]</b>   | <b>5.16 [2.83-9.39]</b>  | <b>3.10 [2.74-3.51]</b> | <b>4.27 [3.47-5.25]</b> |
| <b>Obesity</b>                        |                           |                          |                         |                         |
| Underweight                           | 0.38 [0.05-2.79]          | <b>0.12 [0.02-0.96]</b>  | <b>0.37 [0.26-0.53]</b> | <b>0.38 [0.16-0.93]</b> |
| Normal                                | <i>Reference</i>          | <i>Reference</i>         | <i>Reference</i>        | <i>Reference</i>        |
| Overweight                            | 1.38 [0.60-3.21]          | <b>2.35 [1.06-5.24]</b>  | <b>1.30 [1.15-1.47]</b> | <b>1.59 [1.27-2.01]</b> |
| Obesity                               | <b>3.21 [1.56-6.62]</b>   | <b>9.53 [4.78-18.97]</b> | <b>2.42 [2.17-2.70]</b> | <b>4.00 [3.30-4.85]</b> |
| <b>BMI (kg/m2)</b>                    | <b>1.19 [1.12-1.26]</b>   | <b>1.32 [1.26-1.38]</b>  | <b>1.18 [1.16-1.20]</b> | <b>1.24 [1.22-1.27]</b> |
| <b>Waist circumference (cm)</b>       | <b>1.07 [1.04-1.10]</b>   | <b>1.12 [1.10-1.14]</b>  | <b>1.08 [1.07-1.08]</b> | <b>1.09 [1.08-1.10]</b> |
| <b>Self-reported health status</b>    |                           |                          |                         |                         |
| Very bad                              | <b>17.92 [6.81-47.19]</b> | 1.77 [0.24-13.09]        | <b>2.87 [2.39-3.44]</b> | 1.15 [0.77-1.74]        |
| Bad                                   | <b>4.48 [2.55-7.86]</b>   | <b>1.74 [1.01-2.99]</b>  | <b>1.98 [1.76-2.23]</b> | 1.18 [0.96-1.46]        |
| Normal                                |                           |                          |                         |                         |
| Good                                  | <b>0.32 [0.15-0.71]</b>   | <b>0.54 [0.31-0.93]</b>  | <b>0.48 [0.42-0.55]</b> | <b>0.60 [0.49-0.73]</b> |
| Very good                             | 0.48 [0.11-2.07]          | 0.15 [0.02-1.07]         | <b>0.36 [0.26-0.49]</b> | 0.76 [0.53-1.09]        |
| <b>EuroQol-5D (EQ-5D) index score</b> | <b>0.01 [0.00-0.03]</b>   | 0.52 [0.02-12.86]        | <b>0.29 [0.21-0.40]</b> | 0.57 [0.29-1.12]        |
| <b>Health determinant</b>             |                           |                          |                         |                         |
| <b>Current smoking status</b>         |                           |                          |                         |                         |
| No                                    | <i>Reference</i>          | <i>Reference</i>         | <i>Reference</i>        | <i>Reference</i>        |
| Yes                                   | <b>1.84 [1.05-3.22]</b>   | 1.49 [0.91-2.44]         | <b>1.23 [1.08-1.40]</b> | <b>1.33 [1.10-1.61]</b> |
| <b>Heavy alcohol consumption</b>      |                           |                          |                         |                         |
| No                                    | <i>Reference</i>          | <i>Reference</i>         | <i>Reference</i>        | <i>Reference</i>        |
| Yes                                   | 1.68 [0.90-3.13]          | 1.46 [0.88-2.44]         | <b>1.49 [1.25-1.77]</b> | <b>1.85 [1.48-2.31]</b> |
| <b>Walking</b>                        |                           |                          |                         |                         |
| No                                    | <i>Reference</i>          | <i>Reference</i>         | <i>Reference</i>        | <i>Reference</i>        |
| Yes                                   | 1.13 [0.58-2.22]          | 0.80 [0.43-1.49]         | 1.03 [0.91-1.17]        | 0.80 [0.63-1.01]        |

|                                                   |                          |                         |                         |                         |
|---------------------------------------------------|--------------------------|-------------------------|-------------------------|-------------------------|
| <b>Muscle training</b>                            |                          |                         |                         |                         |
| No                                                | <i>Reference</i>         | <i>Reference</i>        | <i>Reference</i>        | <i>Reference</i>        |
| Yes                                               | 0.74 [0.40-1.37]         | 0.66 [0.36-1.19]        | 0.89 [0.79-1.01]        | <b>0.79 [0.65-0.96]</b> |
| <b><i>Healthcare accessibility</i></b>            |                          |                         |                         |                         |
| <b>Undergone the national health screening</b>    |                          |                         |                         |                         |
| No                                                | <i>Reference</i>         | <i>Reference</i>        | <i>Reference</i>        | <i>Reference</i>        |
| Yes                                               | 0.65 [0.39-1.07]         | <b>0.61 [0.40-0.94]</b> | <b>0.84 [0.76-0.92]</b> | <b>0.59 [0.50-0.69]</b> |
| <b>Undergone cancer screening test</b>            |                          |                         |                         |                         |
| No                                                | <i>Reference</i>         | <i>Reference</i>        | <i>Reference</i>        | <i>Reference</i>        |
| Yes                                               | 0.62 [0.36-1.08]         | 0.67 [0.40-1.12]        | 0.95 [0.86-1.04]        | <b>0.63 [0.54-0.73]</b> |
| <b>Outpatient visit</b>                           |                          |                         |                         |                         |
| No                                                | <i>Reference</i>         | <i>Reference</i>        | <i>Reference</i>        | <i>Reference</i>        |
| Yes                                               | <b>3.82 [1.08-13.52]</b> | 1.17 [0.48-2.84]        | <b>1.51 [1.26-1.81]</b> | 1.06 [0.79-1.41]        |
| <b><i>Laboratory test</i></b>                     |                          |                         |                         |                         |
| Total cholesterol (mg/dL)                         | 1.00 [0.99-1.01]         | <b>1.02 [1.01-1.02]</b> | <b>0.99 [0.98-0.99]</b> | <b>1.01 [1.01-1.01]</b> |
| High-density lipoprotein (mg/dL)                  | <b>0.97 [0.95-1.00]</b>  | <b>0.94 [0.92-0.96]</b> | <b>0.96 [0.96-0.97]</b> | <b>0.97 [0.96-0.98]</b> |
| Blood creatinine (mg/dL)                          | 0.10 [0.00-2.07]         | <b>0.02 [0.00-0.20]</b> | <b>1.45 [1.04-2.01]</b> | <b>0.47 [0.28-0.78]</b> |
| Estimated glomerular filtration rate (e-GFR) test | <b>1.01 [1.00-1.02]</b>  | <b>1.02 [1.01-1.03]</b> | <b>0.99 [0.99-1.00]</b> | <b>1.01 [1.00-1.01]</b> |
| Blood urea nitrogen (mg/dL)                       | <b>1.05 [1.00-1.10]</b>  | 1.03 [0.97-1.09]        | <b>1.03 [1.02-1.05]</b> | <b>1.01 [1.00-1.03]</b> |
| Systolic blood pressure (mmHg)                    | <b>1.03 [1.01-1.05]</b>  | <b>1.05 [1.04-1.07]</b> | <b>1.01 [1.01-1.01]</b> | <b>1.03 [1.02-1.03]</b> |
| Diastolic blood pressure (mmHg)                   | <b>1.04 [1.01-1.06]</b>  | <b>1.05 [1.04-1.07]</b> | <b>0.99 [0.99-1.00]</b> | <b>1.04 [1.03-1.05]</b> |
| Fasting blood glucose (mg/dL)                     | <b>1.38 [1.28-1.48]</b>  | <b>1.39 [1.29-1.49]</b> | <b>1.29 [1.26-1.32]</b> | <b>1.30 [1.27-1.33]</b> |
| Triglyceride concentration (mg/dL)                | <b>1.00 [1.00-1.00]</b>  | <b>1.00 [1.00-1.00]</b> | <b>1.00 [1.00-1.00]</b> | <b>1.00 [1.00-1.01]</b> |

OR with 95% CI written in bold style indicates that p-value is less than 0.05

**Supplement table 2.** Sex subgroup analysis results for the impact of baseline risk factors on people with DM and UDM using age-adjusted multinomial logistic regression model with the without DM group as reference

| Variables                          | Male                    |                         | Female                  |                         |
|------------------------------------|-------------------------|-------------------------|-------------------------|-------------------------|
|                                    | Known                   | Unknown                 | Known                   | Unknown                 |
|                                    | OR [95% CI]             | OR [95% CI]             | OR [95% CI]             | OR [95% CI]             |
| <i>Demographic characteristics</i> |                         |                         |                         |                         |
| <b>Educational attainment</b>      |                         |                         |                         |                         |
| High school or less                | <i>Reference</i>        | <i>Reference</i>        | <i>Reference</i>        | <i>Reference</i>        |
| Higher than high school            | <b>0.67 [0.57-0.79]</b> | <b>0.74 [0.58-0.93]</b> | <b>0.45 [0.36-0.58]</b> | <b>0.43 [0.31-0.59]</b> |
| <b>Marital status</b>              |                         |                         |                         |                         |
| Not married                        | <i>Reference</i>        | <i>Reference</i>        | <i>Reference</i>        | <i>Reference</i>        |
| Married                            | <b>0.98 [0.98-0.98]</b> | <b>1.40 [1.40-1.40]</b> | <b>1.88 [1.13-3.12]</b> | <b>1.87 [1.06-3.29]</b> |
| <b>Employment status</b>           |                         |                         |                         |                         |
| No                                 | <i>Reference</i>        | <i>Reference</i>        | <i>Reference</i>        | <i>Reference</i>        |
| Yes                                | 1.01 [0.87-1.18]        | <b>1.36 [1.08-1.72]</b> | <b>0.77 [0.67-0.88]</b> | 0.87 [0.69-1.09]        |
| <b>Income level</b>                |                         |                         |                         |                         |
| Low                                | <i>Reference</i>        | <i>Reference</i>        | <i>Reference</i>        | <i>Reference</i>        |
| Middle-low                         | <b>0.83 [0.70-1.00]</b> | 0.82 [0.63-1.05]        | <b>0.84 [0.70-1.00]</b> | <b>0.61 [0.46-0.80]</b> |
| Middle                             | <b>0.71 [0.59-0.87]</b> | <b>0.64 [0.49-0.83]</b> | <b>0.73 [0.62-0.87]</b> | <b>0.58 [0.44-0.78]</b> |
| High                               | 0.83 [0.68-1.01]        | <b>0.76 [0.59-0.99]</b> | <b>0.66 [0.55-0.80]</b> | <b>0.54 [0.40-0.72]</b> |
| <i>Health status</i>               |                         |                         |                         |                         |
| <b>Family history of diabetes</b>  |                         |                         |                         |                         |
| No                                 | <i>Reference</i>        | <i>Reference</i>        | <i>Reference</i>        | <i>Reference</i>        |
| Yes                                | <b>4.06 [3.42-4.82]</b> | <b>2.41 [1.91-3.05]</b> | <b>4.00 [3.37-4.74]</b> | <b>2.35 [1.84-3.01]</b> |
| <b>Hypertension status</b>         |                         |                         |                         |                         |
| Normal                             | <i>Reference</i>        | <i>Reference</i>        | <i>Reference</i>        | <i>Reference</i>        |

|                                       |                  |                  |                  |                   |
|---------------------------------------|------------------|------------------|------------------|-------------------|
| At high risk                          | 1.21 [0.99-1.48] | 2.19 [1.67-2.89] | 1.88 [1.51-2.34] | 3.11 [2.25-4.29]  |
| Hypertension                          | 2.61 [2.21-3.08] | 4.34 [3.29-5.73] | 4.15 [3.43-5.03] | 4.57 [3.32-6.28]  |
| <b>Obesity</b>                        |                  |                  |                  |                   |
| Underweight                           | 0.23 [0.14-0.39] | 0.31 [0.11-0.90] | 0.51 [0.31-0.83] | 0.24 [0.07-0.82]  |
| Normal                                | <i>Reference</i> | <i>Reference</i> | <i>Reference</i> | <i>Reference</i>  |
| Overweight                            | 1.27 [1.06-1.52] | 1.43 [1.08-1.89] | 1.39 [1.16-1.65] | 2.52 [1.73-3.69]  |
| Obesity                               | 2.14 [1.81-2.53] | 3.31 [2.60-4.20] | 2.97 [2.57-3.44] | 8.54 [6.26-11.66] |
| <b>BMI (kg/m2)</b>                    | 1.16 [1.14-1.19] | 1.22 [1.19-1.26] | 1.20 [1.18-1.22] | 1.30 [1.26-1.33]  |
| <b>Waist circumference (cm)</b>       | 1.07 [1.06-1.08] | 1.08 [1.07-1.09] | 1.08 [1.07-1.09] | 1.12 [1.11-1.13]  |
| <b>Self-reported health status</b>    |                  |                  |                  |                   |
| Very bad                              | 3.11 [2.22-4.35] | 0.92 [0.45-1.89] | 2.71 [2.17-3.39] | 1.21 [0.75-1.94]  |
| Bad                                   | 2.25 [1.87-2.70] | 1.38 [1.05-1.81] | 1.89 [1.62-2.20] | 1.02 [0.77-1.37]  |
| Normal                                |                  |                  |                  |                   |
| Good                                  | 0.43 [0.36-0.52] | 0.52 [0.41-0.67] | 0.53 [0.43-0.65] | 0.70 [0.52-0.94]  |
| Very good                             | 0.31 [0.22-0.44] | 0.56 [0.35-0.88] | 0.45 [0.24-0.82] | 0.81 [0.48-1.34]  |
| <b>EuroQol-5D (EQ-5D) index score</b> | 0.27 [0.15-0.49] | 0.63 [0.22-1.79] | 0.40 [0.26-0.62] | 1.31 [0.56-3.09]  |
| <b>Health determinant</b>             |                  |                  |                  |                   |
| <b>Current smoking status</b>         |                  |                  |                  |                   |
| No                                    | <i>Reference</i> | <i>Reference</i> | <i>Reference</i> | <i>Reference</i>  |
| Yes                                   | 1.26 [1.10-1.45] | 1.41 [1.16-1.72] | 1.25 [0.92-1.69] | 1.47 [0.94-2.30]  |
| <b>Heavy alcohol consumption</b>      |                  |                  |                  |                   |
| No                                    | <i>Reference</i> | <i>Reference</i> | <i>Reference</i> | <i>Reference</i>  |
| Yes                                   | 1.60 [1.33-1.91] | 1.98 [1.60-2.46] | 1.17 [0.73-1.89] | 1.42 [0.82-2.45]  |
| <b>Walking</b>                        |                  |                  |                  |                   |
| No                                    | <i>Reference</i> | <i>Reference</i> | <i>Reference</i> | <i>Reference</i>  |
| Yes                                   | 0.98 [0.81-1.20] | 0.66 [0.49-0.90] | 1.08 [0.89-1.33] | 0.96 [0.70-1.31]  |

|                                                   |                         |                         |                         |                         |
|---------------------------------------------------|-------------------------|-------------------------|-------------------------|-------------------------|
| <b>Muscle training</b>                            |                         |                         |                         |                         |
| No                                                | <i>Reference</i>        | <i>Reference</i>        | <i>Reference</i>        | <i>Reference</i>        |
| Yes                                               | 0.99 [0.85-1.14]        | <b>0.79 [0.63-0.98]</b> | <b>0.73 [0.59-0.91]</b> | <b>0.69 [0.48-0.98]</b> |
| <b><i>Healthcare accessibility</i></b>            |                         |                         |                         |                         |
| <b>Undergone the national health screening</b>    |                         |                         |                         |                         |
| No                                                | <i>Reference</i>        | <i>Reference</i>        | <i>Reference</i>        | <i>Reference</i>        |
| Yes                                               | 0.95 [0.82-1.10]        | <b>0.69 [0.56-0.84]</b> | 0.88 [0.78-1.00]        | <b>0.66 [0.53-0.83]</b> |
| <b>Undergone cancer screening test</b>            |                         |                         |                         |                         |
| No                                                | <i>Reference</i>        | <i>Reference</i>        | <i>Reference</i>        | <i>Reference</i>        |
| Yes                                               | <b>1.20 [1.04-1.38]</b> | <b>0.81 [0.67-0.99]</b> | 0.97 [0.85-1.11]        | <b>0.70 [0.56-0.87]</b> |
| <b>Outpatient visit</b>                           |                         |                         |                         |                         |
| No                                                | <i>Reference</i>        | <i>Reference</i>        | <i>Reference</i>        | <i>Reference</i>        |
| Yes                                               | <b>1.68 [1.29-2.20]</b> | 1.34 [0.93-1.93]        | <b>1.41 [1.12-1.78]</b> | 0.68 [0.43-1.06]        |
| <b><i>Laboratory test</i></b>                     |                         |                         |                         |                         |
| Total cholesterol (mg/dL)                         | <b>0.99 [0.99-0.99]</b> | <b>1.01 [1.01-1.01]</b> | <b>0.99 [0.98-0.99]</b> | <b>1.01 [1.01-1.02]</b> |
| High-density lipoprotein (mg/dL)                  | <b>0.97 [0.96-0.97]</b> | <b>0.97 [0.96-0.98]</b> | <b>0.96 [0.95-0.97]</b> | <b>0.95 [0.94-0.96]</b> |
| Blood creatinine (mg/dL)                          | <b>1.24 [1.03-1.50]</b> | <b>0.35 [0.19-0.67]</b> | <b>1.84 [1.36-2.50]</b> | <b>0.22 [0.09-0.54]</b> |
| Estimated glomerular filtration rate (e-GFR) test | 1.00 [0.99-1.00]        | <b>1.01 [1.00-1.01]</b> | <b>0.99 [0.99-1.00]</b> | <b>1.01 [1.01-1.02]</b> |
| Blood urea nitrogen (mg/dL)                       | <b>1.03 [1.01-1.05]</b> | 1.01 [0.99-1.03]        | <b>1.04 [1.03-1.06]</b> | 1.02 [1.00-1.04]        |
| Systolic blood pressure (mmHg)                    | <b>1.01 [1.01-1.02]</b> | <b>1.03 [1.03-1.04]</b> | <b>1.01 [1.01-1.02]</b> | <b>1.02 [1.02-1.03]</b> |
| Diastolic blood pressure (mmHg)                   | 1.00 [0.99-1.01]        | <b>1.05 [1.04-1.06]</b> | <b>0.99 [0.99-1.00]</b> | <b>1.04 [1.03-1.05]</b> |
| Fasting blood glucose (mg/dL)                     | <b>1.29 [1.25-1.32]</b> | <b>1.29 [1.26-1.33]</b> | <b>1.32 [1.28-1.36]</b> | <b>1.32 [1.29-1.36]</b> |
| Triglyceride concentration (mg/dL)                | <b>1.00 [1.00-1.00]</b> | <b>1.00 [1.00-1.00]</b> | <b>1.01 [1.00-1.01]</b> | <b>1.01 [1.01-1.01]</b> |

OR with 95% CI written in bold style indicates that p-value is less than 0.05

**Supplement table 3.** Age and sex subgroup analysis results for the impact of baseline risk factors on people with UDM using multinomial logistic regression model with the with DM group as reference

| Variables                                 | Age <40 <sup>a</sup>    | Age ≥40 <sup>a</sup>    | Male <sup>b</sup>       | Female <sup>b</sup>     |
|-------------------------------------------|-------------------------|-------------------------|-------------------------|-------------------------|
|                                           | OR [95% CI]             | OR [95% CI]             | OR [95% CI]             | OR [95% CI]             |
| <b><i>Demographic characteristics</i></b> |                         |                         |                         |                         |
| <b>Educational attainment</b>             |                         |                         |                         |                         |
| High school or less                       | <i>Reference</i>        | <i>Reference</i>        | <i>Reference</i>        | <i>Reference</i>        |
| Higher than high school                   | <b>2.10 [1.16-3.79]</b> | 1.02 [0.80-1.29]        | 1.13 [0.86-1.47]        | 1.07 [0.73-1.57]        |
| <b>Marital status</b>                     |                         |                         |                         |                         |
| Not married                               | <i>Reference</i>        | <i>Reference</i>        | <i>Reference</i>        | <i>Reference</i>        |
| Married                                   | 0.79 [0.40-1.54]        | 1.03 [0.63-1.69]        | 1.07 [0.67-1.69]        | 0.97 [0.47-2.04]        |
| <b>Employment status</b>                  |                         |                         |                         |                         |
| No                                        | <i>Reference</i>        | <i>Reference</i>        | <i>Reference</i>        | <i>Reference</i>        |
| Yes                                       | 1.11 [0.52-2.37]        | 1.09 [0.89-1.34]        | 1.15 [0.88-1.50]        | 1.08 [0.82-1.41]        |
| <b>Income level</b>                       |                         |                         |                         |                         |
| Low                                       | <i>Reference</i>        | <i>Reference</i>        | <i>Reference</i>        | <i>Reference</i>        |
| Middle-low                                | 1.13 [0.52-2.49]        | 0.87 [0.69-1.10]        | 0.99 [0.73-1.33]        | 0.76 [0.54-1.06]        |
| Middle                                    | 0.75 [0.32-1.73]        | 0.93 [0.74-1.16]        | 0.90 [0.66-1.23]        | 0.91 [0.66-1.26]        |
| High                                      | 2.17 [0.88-5.33]        | 0.85 [0.67-1.09]        | 0.91 [0.68-1.24]        | 0.99 [0.71-1.40]        |
| <b><i>Health status</i></b>               |                         |                         |                         |                         |
| <b>Family history of diabetes</b>         |                         |                         |                         |                         |
| No                                        | <i>Reference</i>        | <i>Reference</i>        | <i>Reference</i>        | <i>Reference</i>        |
| Yes                                       | 0.68 [0.39-1.16]        | <b>0.51 [0.41-0.64]</b> | <b>0.54 [0.41-0.71]</b> | <b>0.53 [0.39-0.72]</b> |
| <b>Hypertension status</b>                |                         |                         |                         |                         |

|                                       |                                |                         |                         |                          |
|---------------------------------------|--------------------------------|-------------------------|-------------------------|--------------------------|
| Normal                                | <i>Reference</i>               | <i>Reference</i>        | <i>Reference</i>        | <i>Reference</i>         |
| At high risk                          | 1.61 [0.79-3.25]               | <b>1.66 [1.28-2.15]</b> | <b>1.73 [1.24-2.41]</b> | <b>1.55 [1.07-2.24]</b>  |
| Hypertension                          | 1.27 [0.61-2.64]               | 1.34 [1.06-1.68]        | <b>1.52 [1.13-2.04]</b> | 1.06 [0.75-1.49]         |
| <b>Obesity</b>                        |                                |                         |                         |                          |
| Underweight                           | 0.42 [0.02-7.76]               | 1.09 [0.43-2.75]        | 1.64 [0.52-5.17]        | 0.44 [0.10-2.03]         |
| Normal                                | <i>Reference</i>               | <i>Reference</i>        | <i>Reference</i>        | <i>Reference</i>         |
| Overweight                            | 1.77 [0.66-4.75]               | 1.18 [0.91-1.52]        | 1.13 [0.82-1.56]        | 1.45 [0.95-2.21]         |
| Obesity                               | <b>3.11 [1.29-7.48]</b>        | <b>1.57 [1.26-1.95]</b> | <b>1.46 [1.09-1.94]</b> | <b>2.13 [1.51-3.00]</b>  |
| <b>BMI (kg/m2)</b>                    | <b>1.11 [1.04-1.18]</b>        | <b>1.05 [1.02-1.07]</b> | <b>1.05 [1.01-1.08]</b> | <b>1.07 [1.03-1.11]</b>  |
| <b>Waist circumference (cm)</b>       | <b>1.05 [1.02-1.08]</b>        | <b>1.01 [1.00-1.02]</b> | <b>1.01 [1.00-1.02]</b> | <b>1.02 [1.01-1.04]</b>  |
| <b>Self-reported health status</b>    |                                |                         |                         |                          |
| Very bad                              | <b>0.10 [0.01-0.93]</b>        | <b>0.38 [0.25-0.57]</b> | <b>0.29 [0.14-0.59]</b> | <b>0.41 [0.25-0.67]</b>  |
| Bad                                   | <b>0.38 [0.19-0.77]</b>        | <b>0.55 [0.43-0.69]</b> | <b>0.57 [0.42-0.78]</b> | <b>0.46 [0.33-0.63]</b>  |
| Normal                                |                                |                         |                         |                          |
| Good                                  | 1.67 [0.65-4.28]               | <b>1.45 [1.15-1.83]</b> | <b>1.41 [1.06-1.89]</b> | <b>1.57 [1.08-2.28]</b>  |
| Very good                             | 0.31 [0.02-3.76]               | <b>2.50 [1.53-4.08]</b> | <b>2.68 [1.52-4.73]</b> | <b>1.71 [0.71-4.13]</b>  |
| <b>EuroQol-5D (EQ-5D) index score</b> | <b>156.39 [2.06-11,887.51]</b> | <b>2.64 [1.20-5.84]</b> | 2.16 [0.60-7.85]        | <b>4.45 [1.78-11.17]</b> |

---

### *Health determinant*

---

|                                  |                  |                  |                  |                  |
|----------------------------------|------------------|------------------|------------------|------------------|
| <b>Current smoking status</b>    |                  |                  |                  |                  |
| No                               | <i>Reference</i> | <i>Reference</i> | <i>Reference</i> | <i>Reference</i> |
| Yes                              | 0.80 [0.41-1.56] | 1.08 [0.87-1.34] | 1.04 [0.83-1.31] | 1.19 [0.71-2.00] |
| <b>Heavy alcohol consumption</b> |                  |                  |                  |                  |
| No                               | <i>Reference</i> | <i>Reference</i> | <i>Reference</i> | <i>Reference</i> |
| Yes                              | 0.83 [0.40-1.73] | 1.25 [0.95-1.64] | 1.19 [0.91-1.56] | 1.28 [0.62-2.68] |
| <b>Walking</b>                   |                  |                  |                  |                  |
| No                               | <i>Reference</i> | <i>Reference</i> | <i>Reference</i> | <i>Reference</i> |

|                        |                  |                  |                         |                  |
|------------------------|------------------|------------------|-------------------------|------------------|
| Yes                    | 0.70 [0.29-1.67] | 0.81 [0.62-1.05] | <b>0.68 [0.47-0.98]</b> | 0.99 [0.68-1.42] |
| <b>Muscle training</b> |                  |                  |                         |                  |
| No                     | <i>Reference</i> | <i>Reference</i> | <i>Reference</i>        | <i>Reference</i> |
| Yes                    | 0.91 [0.40-2.04] | 0.86 [0.69-1.07] | 0.84 [0.66-1.07]        | 0.88 [0.58-1.34] |

---

### *Healthcare accessibility*

---

#### **Undergone the national health screening**

|     |                  |                         |                         |                         |
|-----|------------------|-------------------------|-------------------------|-------------------------|
| No  | <i>Reference</i> | <i>Reference</i>        | <i>Reference</i>        | <i>Reference</i>        |
| Yes | 0.96 [0.53-1.73] | <b>0.71 [0.59-0.86]</b> | <b>0.75 [0.59-0.96]</b> | <b>0.73 [0.56-0.94]</b> |

#### **Undergone cancer screening test**

|     |                  |                         |                         |                         |
|-----|------------------|-------------------------|-------------------------|-------------------------|
| No  | <i>Reference</i> | <i>Reference</i>        | <i>Reference</i>        | <i>Reference</i>        |
| Yes | 1.08 [0.52-2.24] | <b>0.69 [0.58-0.82]</b> | <b>0.70 [0.56-0.88]</b> | <b>0.73 [0.56-0.94]</b> |

#### **Outpatient visit**

|     |                  |                         |                  |                         |
|-----|------------------|-------------------------|------------------|-------------------------|
| No  | <i>Reference</i> | <i>Reference</i>        | <i>Reference</i> | <i>Reference</i>        |
| Yes | 0.30 [0.08-1.15] | <b>0.67 [0.48-0.93]</b> | 0.79 [0.53-1.19] | <b>0.45 [0.28-0.74]</b> |

---

### *Laboratory test*

---

|                                                          |                         |                         |                         |                         |
|----------------------------------------------------------|-------------------------|-------------------------|-------------------------|-------------------------|
| <b>Total cholesterol (mg/dL)</b>                         | <b>1.02 [1.01-1.03]</b> | <b>1.02 [1.01-1.02]</b> | <b>1.02 [1.01-1.02]</b> | <b>1.02 [1.01-1.02]</b> |
| <b>High-density lipoprotein (mg/dL)</b>                  | <b>0.96 [0.94-0.99]</b> | <b>1.01 [1.00-1.02]</b> | 1.01 [1.00-1.02]        | 1.00 [0.99-1.01]        |
| <b>Blood creatinine (mg/dL)</b>                          | 0.40 [0.05-3.27]        | <b>0.41 [0.28-0.60]</b> | <b>0.50 [0.32-0.79]</b> | <b>0.23 [0.11-0.46]</b> |
| <b>Estimated glomerular filtration rate (e-GFR) test</b> | 1.01 [0.99-1.02]        | <b>1.01 [1.00-1.01]</b> | <b>1.01 [1.00-1.01]</b> | <b>1.01 [1.00-1.01]</b> |
| <b>Blood urea nitrogen (mg/dL)</b>                       | 0.98 [0.90-1.06]        | <b>0.97 [0.96-0.99]</b> | <b>0.98 [0.96-1.00]</b> | <b>0.97 [0.95-0.99]</b> |
| <b>Systolic blood pressure (mmHg)</b>                    | <b>1.03 [1.00-1.06]</b> | <b>1.01 [1.01-1.02]</b> | <b>1.02 [1.01-1.03]</b> | <b>1.01 [1.00-1.02]</b> |
| <b>Diastolic blood pressure (mmHg)</b>                   | 1.02 [0.99-1.05]        | <b>1.04 [1.03-1.05]</b> | <b>1.04 [1.03-1.05]</b> | <b>1.04 [1.02-1.05]</b> |
| <b>Fasting blood glucose (mg/dL)</b>                     | <b>1.01 [1.00-1.01]</b> | <b>1.01 [1.00-1.01]</b> | <b>1.01 [1.00-1.01]</b> | <b>1.01 [1.00-1.01]</b> |
| <b>Triglyceride concentration (mg/dL)</b>                | 1.00 [1.00-1.01]        | <b>1.00 [1.00-1.00]</b> | <b>1.00 [1.00-1.00]</b> | <b>1.00 [1.00-1.00]</b> |

<sup>a</sup> Age- and sex-adjusted logistic regression model was used; <sup>b</sup> Age-adjusted logistic regression model was used; OR with 95% CI written in bold style indicates that p-value is less than 0.05

**Supplementary Table 4.** Results of the multivariable analysis investigating the association between the baseline risk factors and UDM status using a logistic regression model. The DM group was used as the reference.

| Variables                                  | Full model <sup>a,c</sup> | Reduced model <sup>b,c</sup> |
|--------------------------------------------|---------------------------|------------------------------|
|                                            | AOR [95% CI]              | AOR [95% CI]                 |
| <b>Age</b>                                 |                           |                              |
| 20-29                                      | <i>Reference</i>          | <i>Reference</i>             |
| 30-39                                      | 0.63 [0.26-1.55]          | 0.79 [0.34-1.83]             |
| 40-49                                      | <b>0.41 [0.17-0.95]</b>   | 0.52 [0.24-1.16]             |
| 50-59                                      | <b>0.23 [0.10-0.54]</b>   | <b>0.24 [0.11-0.53]</b>      |
| 60-69                                      | <b>0.16 [0.07-0.38]</b>   | <b>0.13 [0.06-0.30]</b>      |
| 70≥                                        | <b>0.14 [0.06-0.34]</b>   | <b>0.09 [0.04-0.21]</b>      |
| <b>Sex</b>                                 |                           |                              |
| Female                                     | <i>Reference</i>          | <i>Reference</i>             |
| Male                                       | <b>1.33 [1.08-1.63]</b>   | <b>1.27 [1.07-1.51]</b>      |
| <b>Educational attainment</b>              |                           |                              |
| High school or less                        | <i>Reference</i>          |                              |
| Higher than high school                    | 1.07 [0.84-1.38]          |                              |
| <b>Marital status</b>                      |                           |                              |
| Not married                                | <i>Reference</i>          |                              |
| Married                                    | 1.17 [0.73-1.87]          |                              |
| <b>Family history of diabetes</b>          |                           |                              |
| No                                         | <i>Reference</i>          | <i>Reference</i>             |
| Yes                                        | <b>0.51 [0.41-0.64]</b>   | <b>0.53 [0.43-0.66]</b>      |
| <b>Hypertension status</b>                 |                           |                              |
| Normal                                     | <i>Reference</i>          | <i>Reference</i>             |
| At high risk                               | 0.95 [0.71-1.27]          | <b>1.53 [1.18-1.97]</b>      |
| Hypertension                               | <b>0.72 [0.54-0.97]</b>   | 1.10 [0.87-1.38]             |
| <b>Obesity</b>                             |                           |                              |
| Underweight                                | 0.88 [0.40-1.96]          | 0.93 [0.38-2.27]             |
| Normal                                     | <i>Reference</i>          | <i>Reference</i>             |
| Overweight                                 | 1.17 [0.89-1.54]          | 1.23 [0.95-1.60]             |
| Obese                                      | <b>1.51 [1.19-1.91]</b>   | <b>1.71 [1.36-2.15]</b>      |
| <b>Current smoking status</b>              |                           |                              |
| No                                         | <i>Reference</i>          |                              |
| Yes                                        | 1.07 [0.85-1.35]          |                              |
| <b>Heavy alcohol consumption</b>           |                           |                              |
| No                                         | <i>Reference</i>          |                              |
| Yes                                        | 1.07 [0.79-1.46]          |                              |
| <b>Walking</b>                             |                           |                              |
| No                                         | <i>Reference</i>          |                              |
| Yes                                        | 0.83 [0.63-1.1]           |                              |
| <b>Undergone national health screening</b> |                           |                              |

|                                                                                                                                                                                                                                                                                                                                                                                                                                                                                                                                                                                                                                                   |                         |                         |
|---------------------------------------------------------------------------------------------------------------------------------------------------------------------------------------------------------------------------------------------------------------------------------------------------------------------------------------------------------------------------------------------------------------------------------------------------------------------------------------------------------------------------------------------------------------------------------------------------------------------------------------------------|-------------------------|-------------------------|
| No                                                                                                                                                                                                                                                                                                                                                                                                                                                                                                                                                                                                                                                | <i>Reference</i>        |                         |
| Yes                                                                                                                                                                                                                                                                                                                                                                                                                                                                                                                                                                                                                                               | 1.00 [0.75-1.33]        |                         |
| <b>Undergone cancer screening test</b>                                                                                                                                                                                                                                                                                                                                                                                                                                                                                                                                                                                                            |                         |                         |
| No                                                                                                                                                                                                                                                                                                                                                                                                                                                                                                                                                                                                                                                | <i>Reference</i>        | <i>Reference</i>        |
| Yes                                                                                                                                                                                                                                                                                                                                                                                                                                                                                                                                                                                                                                               | 0.81 [0.62-1.06]        | <b>0.75 [0.63-0.89]</b> |
| <b>Total cholesterol (mg/dL)</b>                                                                                                                                                                                                                                                                                                                                                                                                                                                                                                                                                                                                                  | <b>1.02 [1.01-1.02]</b> |                         |
| <b>Systolic blood pressure (mmHg)</b>                                                                                                                                                                                                                                                                                                                                                                                                                                                                                                                                                                                                             |                         |                         |
| <b>Diastolic blood pressure (mmHg)</b>                                                                                                                                                                                                                                                                                                                                                                                                                                                                                                                                                                                                            | <b>1.03 [1.02-1.05]</b> |                         |
| <b>Fasting blood glucose (mg/dL)</b>                                                                                                                                                                                                                                                                                                                                                                                                                                                                                                                                                                                                              | <b>1.00 [1.00-1.01]</b> |                         |
| <b>Triglyceride concentration (mg/dL)</b>                                                                                                                                                                                                                                                                                                                                                                                                                                                                                                                                                                                                         | <b>1.00 [1.00-1.00]</b> |                         |
| <sup>a</sup> A multivariable logistic regression model was used for the analysis. Variables that significantly explained the difference of ORs between UDM and DM on univariate analysis were included in the model; <sup>b</sup> Variables that significantly explained the difference in AORs between UDM and DM were retained from the full model. Model reduction was performed using backward stepwise elimination based on the magnitude of the p-value of each variable. Variables for laboratory test results were excluded at the initial step of reducing the model; <sup>c</sup> OR with 95% CIs in bold style indicate a p-value <.05 |                         |                         |

DM, diabetes mellitus; CI, confidence interval; OR, odds ratio; UDM, undefined diabetes mellitus
